# Supplementary material for: Doxcycline post-exposure prophylaxis: are we using the correct method to assess for effect on antimicrobial resistance?
Source: Preprints.org preprint supplement (doi:10.20944/preprints202401.0148.v1), 2024-01-03
Supplement: Supplementary file 1 [file supplementary]

**Supplementary file**

**STable. Species identified on MALDI TOF MS at day 0 and day 14**

Day 0

species_IDENTIFICATION | Freq. Percent Cum.

----------------------------------------+-----------------------------------

Streptococcus anginosus | 2 3.57 3.57

Streptococcus cristatus | 2 3.57 7.14

Streptococcus mitis oralis | 27 48.21 55.36

Streptococcus parasanguinis | 5 8.93 64.29

Streptococcus pneumoniae | 3 5.36 69.64

Streptococcus pseudopneumoniae | 1 1.79 71.43

Streptococcus salivarius | 1 1.79 73.21

Streptococcus sanguinis | 12 21.43 94.64

Streptococcus vestibularis | 3 5.36 100.00

----------------------------------------+-----------------------------------

Total | 56 100.00

--------------------------------------------------------------------------------------------------------------------------------

Day = 14

species_IDENTIFICATION | Freq. Percent Cum.

----------------------------------------+-----------------------------------

Streptococcus anginosus | 2 3.45 3.45

Streptococcus cristatus | 3 5.17 8.62

Streptococcus gordonii | 1 1.72 10.34

Streptococcus infantis | 1 1.72 12.07

Streptococcus mitis oralis | 30 51.72 63.79

Streptococcus parasanguinis | 6 10.34 74.14

Streptococcus pneumoniae | 1 1.72 75.86

Streptococcus pseudopneumoniae | 1 1.72 77.59

Streptococcus salivarius | 3 5.17 82.76

Streptococcus sanguinis | 8 13.79 96.55

Streptococcus vestibularis | 2 3.45 100.00

----------------------------------------+-----------------------------------

Total | 58 100.00

SFigure 1. The azithromycin MIC distribution of colonies of confirmed *Streptococcus mitis* from oral rinses of individuals who received 2g azithromycin PO and ceftriaxone 1g IMI at day 0 and 14 days later (day 14; Two-sample Wilcoxon rank-sum test, P=0.0245)
